# Supplementary material
Source: PubMed Central journal article supplement (PMC2905085)
Supplement: mmc1.pdf [file mmc1.pdf]

Biophysical Journal, Volume 99

**Supporting Material**

**Implication of Sphingomyelin/Ceramide Molar Ratio on the Biological Activity of Sphingomyelinase**

Beate Boulgaropoulos, Heinz Amenitsch, Peter Laggner, and Georg Pabst

# Implication of Sphingomyelin/Ceramide Molar Ratio on the Biological Activity of Sphingomyelinase

Beate Boulgaropoulos, Heinz Amenitsch, Peter Laggner and Georg Pabst

Institute of Biophysics and Nanosystems Research, Austrian Academy of Sciences, Schmiedlstr. 6, A-8042 Graz, Austria

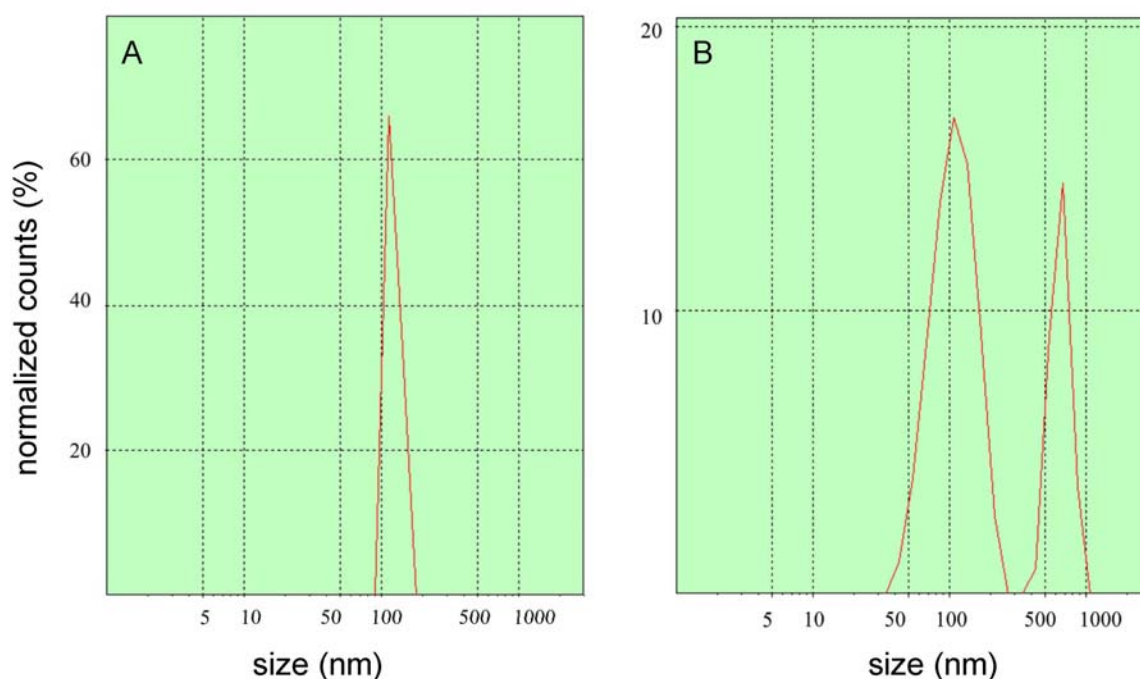

**Supporting Figure S1:** Size distributions of vesicles as determined from photon correlation spectroscopy. Panel A shows a single distribution centered at 120 nm (PDI = 0.13) prior to the addition of SMase for LUVs composed of POPC and SM. Enzymatic degradation of SM by SMase leads to a dramatic change of the size distributions in form of a broadening of the original distribution and the generation of second population of vesicles (MLVs) with an average size of 700 nm (Panel B).

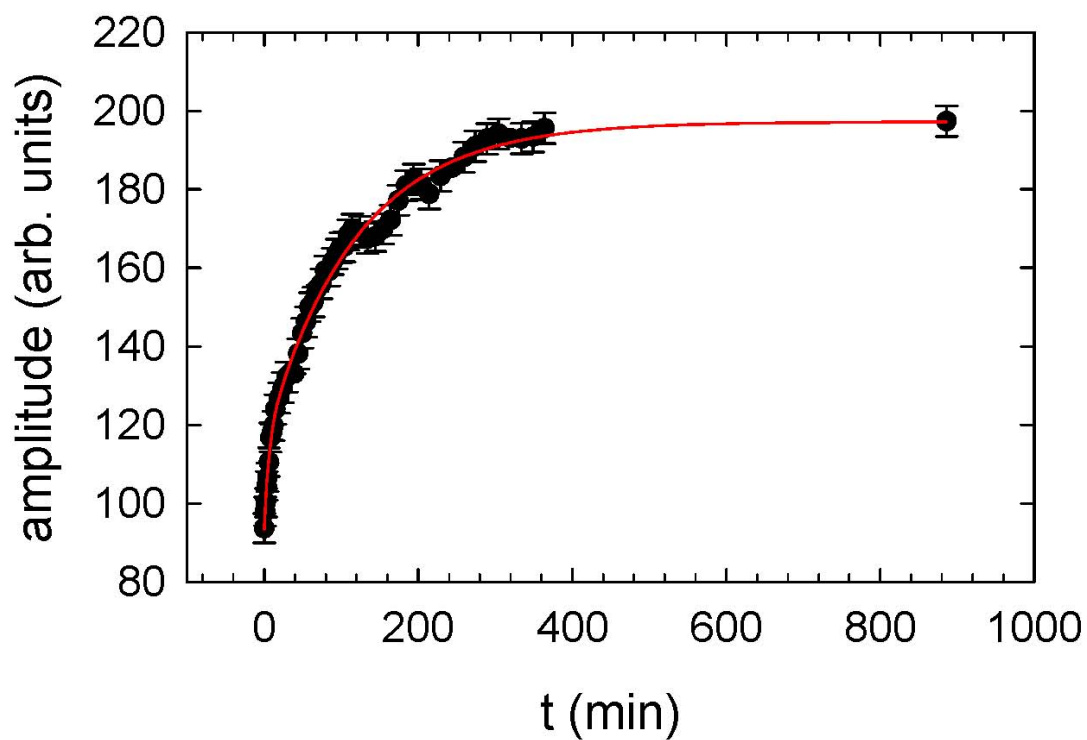

**Supporting Figure S2:** Increase of the WAXS peak amplitude during SMase activity. The red line shows a double exponential fit ( $\text{amp} = a + b[1 - \exp(-t/t_1)] + c[1 - \exp(-t/t_2)]$ ; a, b, c...constants) yielding the time constants  $t_1 = 6.0 \pm 1.5$  min and  $t_2 = 116 \pm 7$  min.
